# Supplementary material for: Genome-Wide Analysis Reveals a Complex Pattern of Genomic Imprinting in Mice
Source: PLoS Genet. 2008 Jun 6;4(6):e1000091. doi: 10.1371/journal.pgen.1000091 (PMC2390766; doi:10.1371/journal.pgen.1000091)
Supplement: Table S1 — Additional information about the significant iQTL. Listed are the iQTL name, the traits affected by the iQTL, the marker name at the iQTL location along with its F2 map position in cM, and its physical coordinate in mouse genome build 36 (www.ensembl.org). The effect of the QTL is listed for all traits where the imprinting effect was significant. These are given as the additive (a), dominance (d) and imprinting (i) genotypic values, their standard errors (SE) and significance (p) value. These are followed by the LPR for the overall effect of a locus and the significance threshold at the chromosome level for the chromosome containing the QTL. Under the heading ‘Characterizing the pattern of imprinting’ are the ratio of the additive to the imprinting genotypic values (a/i), the dominance to imprinting ratio (d/i), the standardized imprinting values (i/SD), the standard deviation of the trait (SD), the R 2 (rsq%) value of the imprinting effect alone and R 2 for the overall variance explained by a locus, the best fit pattern along with the LPR value associated with the contrast for that pattern. These are followed by the genotypic values of the four ordered genotypes LL, LS, SL, SS and their standard errors (SE), which were estimated by the mixed model fitted by REML (i.e., the model used to detect and characterize QTL effects). (0.08 MB XLS) [file pgen.1000091.s001.xls]

## Sheet: Sheet1
QTL ID	Traits	QTL Location			QTL effects											Significance test for locus			Characterizing the pattern of imprinting									Genotypic values of the Ordered Genotypes
iQTL		Marker	F2 Map location (cM)	Genome coordinate	additive effect				dominance effect				parent of origin effect			LPR	LPR threshold (chr. level)									LPR for pattern
					a	a SE	p		d	d SE	p		i	i SE	p				(a/i)	(d/i)	(i/SD)	SD (trait)	rsq % i	rsq % locus	pattern			LL	LL SE		LS	LS SE		SL	SL SE		SS	SS SE
Wti1.1	week6	rs4137502	8.26	31054038	0.42	0.12	<0.001		-0.07547	0.147	0.6079		0.2756	0.1216	0.0237	4.92	2.31		1.52395	-0.273839	0.1073	2.5685	0.575664	1.93418	Paternal	3.51		24.1509	0.2372		23.9302	0.2278		23.379	0.2299		23.3093	0.2187
	week7				0.4923	0.1365	<0.001		-0.08266	0.1664	0.6195		0.3575	0.1375	0.0095	5.4			1.37706	-0.231217	0.125084	2.85807	0.782305	2.2867	Paternal	2.02		25.6286	0.2663		25.4112	0.2557		24.6961	0.2581		24.644	0.2453
	week8				0.5631	0.1547	<0.001		0.000221	0.1895	1		0.4534	0.1558	0.0037	5.01			1.24195	0.000487428	0.143302	3.16394	1.02678	2.61051	Paternal	2.43		27.0815	0.2942		26.972	0.2819		26.0651	0.2846		25.9552	0.2697
	week9				0.5926	0.1685	<0.001		0.02215	0.2065	0.91		0.4937	0.1697	0.0037	4.86			1.20032	0.0448653	0.143268	3.446	1.02628	2.50596	Paternal	4.28		28.2199	0.3199		28.1431	0.3066		27.1558	0.3095		27.0347	0.2933
	growth 3-10				0.4754	0.1585	0.0028		0.1726	0.1961	0.379		0.4213	0.1597	0.0085	3.65			1.12841	0.409684	0.131334	3.20785	0.86243	2.03295	Paternal	3.45		17.7799	0.2895		17.8984	0.2767		17.0558	0.2793		16.8291	0.2634
Wti2.1	week1	rs13476319	0	3379629	0.02382	0.02784	0.3924		-0.1061	0.03548	0.0028		0.09852	0.02988	0.001	3.15	2.29		0.241778	-1.07694	0.122343	0.805274	0.748396	1.22614	Polar Und	4.15		4.3037	0.05324		4.2724	0.05044		4.0753	0.05938		4.2561	0.05342
	week2				0.01797	0.03426	0.6		-0.04499	0.0438	0.305		0.08501	0.03674	0.0208	0.93			0.211387	-0.529232	0.0884479	0.961131	0.391151	0.463408	Polar Und	1.68		7.3273	0.06372		7.3493	0.06013		7.1793	0.07142		7.2913	0.0639
	week3				0.04684	0.05294	0.376		-0.04673	0.06722	0.487		0.117	0.05688	0.0399	1.27			0.400342	-0.399402	0.0745249	1.56995	0.277698	0.344355	Paternal	1.45		11.1813	0.1054		11.2047	0.1003		10.9707	0.1167		11.0876	0.1058
Wti3.1	week1	rs13476970	1.73	10024340	-0.00369	0.02897	0.8987		0.03393	0.0362	0.3487		-0.08823	0.03136	0.005	1.35	2.25		0.0418225	-0.384563	-0.109565	0.805274	0.600226	0.64566	Bipolar	2.3		4.2296	0.05409		4.179	0.05233		4.3555	0.05993		4.237	0.05406
	week2				-0.01693	0.03549	0.6334		0.05273	0.04454	0.2367		-0.08834	0.03841	0.0216	0.96			0.191646	-0.596898	-0.0919125	0.961131	0.422396	0.513157	Bipolar	1.67		7.2655	0.0644		7.2469	0.06219		7.4235	0.07176		7.2994	0.06438
	week3				-0.05943	0.05494	0.2796		0.09699	0.06835	0.1561		-0.1714	0.0595	0.004	1.45			0.346733	-0.565869	-0.109176	1.56995	0.595967	0.763033	Bipolar	2.39		11.0387	0.1061		11.0238	0.1029		11.3665	0.1168		11.1576	0.106
	week4				-0.04596	0.082	0.5752		0.05237	0.1034	0.6127		-0.2924	0.08871	0.001	1.95			0.157182	-0.179104	-0.131878	2.21721	0.869586	0.905018	Bipolar	3.02		17.2109	0.1448		17.0168	0.1395		17.6016	0.1622		17.3028	0.1448
	week5				0.04388	0.08495	0.6056		0.0265	0.1073	0.8049		-0.2872	0.0919	0.0018	1.37			-0.152786	-0.0922702	-0.125943	2.2804	0.793083	0.814972	Bipolar	2.74		21.7581	0.1492		21.4536	0.1437		22.0279	0.1674		21.6704	0.1492
	week6				0.05555	0.09588	0.5625		0.0267	0.1209	0.8252		-0.2681	0.1037	0.0099	1.17			-0.207199	-0.0995897	-0.10438	2.5685	0.544759	0.570848	Bipolar	2		23.5633	0.1698		23.2664	0.1637		23.8025	0.1902		23.4522	0.1698
	week7				0.09888	0.1076	0.3581		-0.01974	0.1359	0.8845		-0.2388	0.1163	0.0403	0.78			-0.41407	0.0826633	-0.0835529	2.85807	0.349054	0.410094	Maternal	1.5		25.0243	0.1882		24.6669	0.1812		25.1444	0.2113		24.8265	0.1882
	week9				0.17	0.1314	0.1958		0.02993	0.1668	0.8577		-0.2776	0.142	0.05	0.88			-0.612392	-0.107817	-0.0805573	3.446	0.324474	0.448045	Maternal	1.71		27.5981	0.2247		27.1804	0.216		27.7357	0.2535		27.2581	0.2248
	week10				0.2083	0.14	0.137		0.07451	0.1778	0.6752		-0.362	0.1514	0.0169	1.35			-0.575414	-0.205829	-0.0985686	3.67257	0.485788	0.656924	Maternal	2.28		28.6405	0.2397		28.1447	0.2304		28.8687	0.2704		28.2239	0.2398
Wti3.2	week5	rs13477364	60.71	118359586	0.03948	0.08592	0.646		0.008238	0.1061	0.9381		-0.2046	0.08792	0.0201	0.69	2.24		-0.192962	-0.0402639	-0.0897213	2.2804	0.402495	0.417808	Bipolar	1.7		21.7405	0.1473		21.5046	0.1493		21.9138	0.1542		21.6615	0.1554
	week6				0.09733	0.09656	0.3136		0.01265	0.1192	0.9155		-0.3681	0.09884	<0.001	2.66			-0.264412	-0.0343657	-0.143313	2.5685	1.02693	1.09934	Bipolar	3.69		23.5976	0.1666		23.1448	0.169		23.8811	0.1744		23.403	0.1758
	week7				0.07535	0.1082	0.4863		-0.01236	0.1338	0.9264		-0.4519	0.1107	<0.001	3.13			-0.16674	0.0273512	-0.158114	2.85807	1.25	1.28522	Bipolar	4.33		24.992	0.1841		24.4524	0.1867		25.3563	0.1929		24.8413	0.1945
	week8				0.05395	0.1218	0.6579		0.02402	0.1512	0.8738		-0.4557	0.1244	<0.001	2.43			-0.118389	-0.0527101	-0.144029	3.16394	1.03722	1.0532	Bipolar	3.59		26.2924	0.2029		25.8068	0.2057		26.7182	0.2129		26.1845	0.2148
	week9				0.07614	0.1325	0.5655		0.02474	0.1645	0.8804		-0.4822	0.1353	<0.001	2.31			-0.157901	-0.0513065	-0.139931	3.446	0.979027	1.00473	Bipolar	3.42		27.498	0.2203		26.9644	0.2233		27.9288	0.2312		27.3457	0.2333
	week10				0.04619	0.1413	0.7438		0.03689	0.1755	0.8335		-0.5102	0.1443	<0.001	2.24			-0.0905331	-0.072305	-0.138922	3.67257	0.964963	0.975395	Bipolar	3.38		28.4812	0.235		27.9617	0.2382		28.9821	0.2466		28.3888	0.2489
	growth 3-10				0.0447	0.1264	0.7238		0.03597	0.1582	0.8201		-0.4594	0.1287	<0.001	2.29			-0.0973008	-0.0782978	-0.143211	3.20785	1.02547	1.03832	Bipolar	3.43		17.3537	0.2031		16.8856	0.2058		17.8044	0.2138		17.2643	0.216
Wti3.3	week5	rs3722447	82.69	148845957	-0.2725	0.08589	0.0015		-0.1084	0.1045	0.2999		-0.1514	0.08932	0.0903	2.13	2.24		1.79987	0.715984	-0.066392	2.2804	0.220395	0.99086	Paternal	3.22		21.4792	0.15		21.492	0.1489		21.7948	0.1574		22.0243	0.1495
	week6				-0.2598	0.09681	0.0074		-0.148	0.1176	0.2085		-0.235	0.1007	0.0197	2.67			1.10553	0.629787	-0.0914931	2.5685	0.418549	1.01311	Paternal	3.42		23.3102	0.17		23.187	0.1688		23.6571	0.1783		23.8299	0.1695
	week7				-0.2321	0.1085	0.0326		-0.2194	0.1322	0.0972		-0.2953	0.1128	0.009	2.7			0.78598	0.742973	-0.103321	2.85807	0.533766	1.01083	Paternal	3.14		24.7737	0.1881		24.4911	0.1867		25.0817	0.1975		25.2379	0.1875
	week8				-0.2606	0.1218	0.0326		-0.3093	0.1493	0.0384		-0.296	0.1267	0.0196	2.74			0.880405	1.04493	-0.0935541	3.16394	0.437619	1.01574	Paternal	2.83		26.1276	0.2068		25.7829	0.2052		26.3749	0.2176		26.6488	0.2061
	week9				-0.2277	0.1325	0.0859		-0.2484	0.1624	0.1264		-0.3793	0.1378	0.006	2.22			0.600316	0.654891	-0.11007	3.446	0.605768	0.953976	Paternal	2.84		27.3182	0.2246		26.9182	0.2228		27.6767	0.2363		27.7736	0.2238
	week10				-0.3031	0.1414	0.0322		-0.2212	0.1732	0.2018		-0.3784	0.147	0.0102	2.4			0.801004	0.584567	-0.103034	3.67257	0.530802	0.96206	Paternal	3.09		28.0153	0.3548		27.7499	0.3394		28.8472	0.3841		29.0167	0.3439
	growth 3-10				-0.1662	0.1264	0.1888		-0.1832	0.1564	0.2418		-0.3278	0.1315	0.0128	1.68			0.507016	0.558877	-0.102187	3.20785	0.522106	0.73786	Paternal	2.18		17.2396	0.2082		16.8948	0.2064		17.5505	0.2196		17.572	0.2072
Wti5.1	week4	mCV25009162	82.46	143577772	0.2679	0.0845	0.0016		0.09197	0.1022	0.3681		0.1708	0.08729	0.05	2.66	2.24		1.5685	0.538466	0.0770339	2.21721	0.296711	1.06969	Paternal	3.51		17.4676	0.1475		17.4624	0.1526		17.1209	0.1449		16.9318	0.1497
	week5				0.2041	0.08752	0.0198		0.1751	0.1059	0.0987		0.2341	0.09032	0.0096	3.55			0.87185	0.747971	0.102658	2.2804	0.52693	1.07486	Paternal	3.3		21.8115	0.1516		22.0166	0.1569		21.5483	0.1488		21.4032	0.1539
	week6				0.1638	0.09874	0.0974		0.2095	0.1194	0.0795		0.2504	0.102	0.0142	2.03			0.654153	0.836661	0.0974888	2.5685	0.475203	0.844872	Paternal	2.45		23.551	0.1723		23.8471	0.1782		23.3464	0.1692		23.2234	0.1748
	week7				0.1301	0.1107	0.2401		0.2847	0.1341	0.034		0.2932	0.1142	0.0103	2.13			0.443724	0.97101	0.102587	2.85807	0.526202	0.877873	Polar Over	2.87		24.8798	0.1907		25.3276	0.1974		24.7411	0.1871		24.6196	0.1937
	week8				0.04094	0.1245	0.7424		0.2959	0.1516	0.0511		0.3194	0.128	0.0127	1.65			0.128178	0.926425	0.10095	3.16394	0.509544	0.736578	Polar Over	2.65		26.1287	0.2097		26.703	0.2172		26.0643	0.2053		26.0468	0.2132
	week9				0.01025	0.1354	0.9396		0.2366	0.1649	0.1514		0.3839	0.1392	0.0059	1.58			0.0266997	0.616306	0.111405	3.446	0.62055	0.738845	Polar Over	2.6		27.3164	0.2277		27.9267	0.2358		27.1589	0.2229		27.2959	0.2316
	week10				-0.00539	0.1444	0.9702		0.3024	0.1758	0.0856		0.3987	0.1485	0.0073	1.66			-0.0135189	0.758465	0.108562	3.67257	0.589281	0.758886	Polar Over	2.72		28.2842	0.2433		28.9907	0.252		28.1932	0.2382		28.2949	0.2474
	growth 3-10				-0.1177	0.1293	0.3628		0.274	0.1585	0.0841		0.2973	0.1323	0.0248	1.41			-0.395896	0.921628	0.0926788	3.20785	0.429468	0.679175	Polar Over	2.21		17.0626	0.2109		17.7516	0.2186		17.1571	0.2058		17.298	0.215
Wti7.1	week5	gnf07.056.997	27.7	56324216	0.6084	0.1067	<.0001		-0.1067	0.1327	0.4217		0.2813	0.1057	0.008	11.56	2.14		2.16282	-0.37931	0.123356	2.2804	0.760833	4.37457	Paternal	10.47		22.3824	0.1995		21.9487	0.1936		21.386	0.2065		21.1656	0.2049
	week6				0.8318	0.1199	<.0001		-0.1387	0.149	0.3525		0.4026	0.1188	0.0007	15.05			2.06607	-0.344511	0.156745	2.5685	1.22845	6.54518	Paternal	13.94		24.4272	0.2254		23.8593	0.2187		23.054	0.2332		22.7635	0.2314
	week7				0.9053	0.1347	<.0001		-0.1333	0.1676	0.4266		0.4603	0.1335	0.0006	13.62			1.96676	-0.289594	0.161053	2.85807	1.2969	6.36788	Paternal	12.68		25.8958	0.252		25.3174	0.2445		24.3969	0.2609		24.0852	0.2589
	week8				0.9784	0.1502	<.0001		-0.1646	0.1872	0.3795		0.5083	0.1488	0.0007	11.9			1.92485	-0.323825	0.160654	3.16394	1.29048	6.13944	Paternal	11.03		27.2858	0.2763		26.6511	0.2678		25.6345	0.2863		25.329	0.2841
	week9				1.0348	0.1634	<.0001		-0.1355	0.2037	0.5059		0.5925	0.1618	<0.001	12.28			1.7465	-0.228692	0.171939	3.446	1.47815	6.02552	Paternal	12.17		28.5015	0.3005		27.9237	0.2912		26.7387	0.3113		26.4319	0.3089
	week10				1.0528	0.1735	<.0001		-0.2111	0.2157	0.3281		0.6838	0.1719	<0.001	10.75			1.53963	-0.308716	0.186191	3.67257	1.73336	5.92482	Paternal	10.9		29.6115	0.3255		29.0314	0.3159		27.6637	0.3368		27.5058	0.3342
	growth 1-3				0.1534	0.05227	0.0035		0.02786	0.06492	0.668		0.1441	0.0518	0.0056	2.76			1.06454	0.193338	0.126435	1.13971	0.799296	1.72003	Paternal	3.37		7.0697	0.09906		7.0883	0.09618		6.8001	0.1024		6.763	0.1017
	growth 3-10				0.8215	0.1542	<.0001		-0.2742	0.1928	0.1555		0.5703	0.1526	<0.001	8.85			1.44047	-0.4808	0.177782	3.20785	1.58033	5.0421	Paternal	8.78		18.2453	0.2766		17.7199	0.2677		16.5794	0.287		16.6023	0.2849
Wti9.1	week7	gnf09.096.289	52.22	99654867	0.0278	0.1086	0.7979		0.1513	0.1334	0.2569		0.2276	0.1086	0.0363	0.97	2.19		0.122144	0.664763	0.0796341	2.85807	0.31708	0.391871	Polar Over	1.81		24.832	0.1958		25.1831	0.184		24.728	0.1941		24.7764	0.1847
	week8				0.01034	0.1221	0.9325		0.1625	0.1507	0.2809		0.255	0.122	0.0368	0.92			0.040549	0.637255	0.0805956	3.16394	0.324783	0.391263	Polar Over	1.79		26.1461	0.2156		26.5533	0.202		26.0433	0.2137		26.1254	0.203
	week9				-0.01713	0.1326	0.8972		0.227	0.1637	0.1658		0.3451	0.1325	0.0093	1.56			-0.0496378	0.65778	0.100145	3.446	0.501453	0.611172	Polar Over	2.59		27.2635	0.234		27.8528	0.2192		27.1625	0.2319		27.2978	0.2202
	week10				-0.08732	0.1414	0.5371		0.1981	0.1746	0.2567		0.3803	0.1413	0.0072	1.55			-0.229608	0.520905	0.103551	3.67257	0.536145	0.63715	Polar Over	2.51		28.2199	0.2496		28.8857	0.2338		28.125	0.2473		28.3945	0.2349
	growth 3-10				-0.1086	0.1264	0.3903		0.09534	0.1572	0.5444		0.4361	0.1261	0.0006	2.355			-0.249025	0.21862	0.135948	3.20785	0.924087	1.00348	Bipolar	3.25		17.1242	0.2159		17.7643	0.2011		16.892	0.2136		17.3414	0.2023
Wti12.1	week5	rs6184745	42.8	94763235	0.0997	0.08477	0.2397		0.434	0.1022	<.0001		-0.1741	0.08505	0.0408	3.91	2.14		-0.572659	-2.49282	-0.0763464	2.2804	0.291439	1.29254	Polar Over	4		21.5914	0.1493		21.7516	0.148		22.0999	0.1522		21.392	0.1487
	week6				0.0684	0.09561	0.4745		0.4698	0.1151	<.0001		-0.2011	0.0959	0.0362	3.98			-0.340129	-2.33615	-0.0782947	2.5685	0.306503	1.17835	Polar Over	3.92		23.3389	0.1694		23.5392	0.168		23.9414	0.1727		23.2021	0.1687
	week7				0.0484	0.1073	0.6521		0.4601	0.1296	0.0004		-0.2253	0.1077	0.0366	3.1			-0.214825	-2.04217	-0.0788294	2.85807	0.310704	0.972929	Polar Over	3.46		24.7227	0.1876		24.9092	0.186		25.3598	0.1914		24.6259	0.1869
Wti14.1	week4	rs3663148	37.75	81549269	0.1841	0.1073	0.0869		0.06786	0.1323	0.6081		0.259	0.1052	0.014	1.08	2.07		0.710811	0.262008	0.116814	2.21721	0.682272	1.05041	Paternal	2.1		17.3256	0.2074		17.4684	0.1962		16.9503	0.2088		16.9574	0.203
	week5				0.3314	0.0888	<.0001		-0.02	0.1096	0.8553		0.1924	0.08854	0.03	3.66			1.72245	-0.10395	0.0843713	2.2804	0.355926	1.41383	Paternal	4.54		22.0467	0.1565		21.8877	0.1498		21.5029	0.1565		21.3838	0.1484
	week7				0.5463	0.1118	<.0001		-0.1124	0.1383	0.4163		0.2214	0.1115	0.0473	5.41			2.46748	-0.507678	0.0774649	2.85807	0.30004	2.16549	Paternal	5.93		25.5093	0.1958		25.072	0.1873		24.6292	0.1957		24.4167	0.1856

## Sheet: Sheet2
Genotypic values of the Ordered Genotypes
LL	LS	SL	SS
4.18235	4.15393	4.37336	4.28532
7.20916	7.19062	7.46266	7.38241
10.9666	10.9265	11.4598	11.2562
17.1066	16.9203	17.6854	17.507
21.6119	21.3471	22.2398	21.8507
23.4464	23.1788	24.0468	23.5829
24.9411	24.5814	25.4159	24.8938
26.3381	25.8406	26.7616	26.2613
27.4992	27.1011	27.9375	27.3986
28.5905	27.9948	29.045	28.4661
6.78906	6.76778	7.07203	6.98668
21.7693	21.4227	22.0357	21.6443
23.665	23.0829	23.9621	23.3831
25.0798	24.3885	25.3694	24.8608
26.3759	25.7562	26.6915	26.2344
27.5745	26.9289	27.893	27.4127
28.6304	27.841	29.015	28.4511
17.4547	16.7492	17.7933	17.3994
17.0411	16.9641	17.5308	17.5179
21.4916	21.2925	22.0685	22.0196
23.3105	23.0183	23.9122	23.8479
24.7575	24.3873	25.2497	25.2772
26.1218	25.658	26.557	26.6859
27.3231	26.8221	27.7617	27.8722
28.3344	27.8029	28.8111	28.9447
17.322	16.7819	17.6051	17.6406
21.7066	22.0561	21.4503	21.6503
23.5689	23.8475	23.1668	23.5039
24.9528	25.3111	24.5272	24.8957
26.2939	26.7122	25.7731	26.275
27.4688	27.8738	26.9143	27.5619
28.4228	28.9322	27.9587	28.6186
28.2074	28.944	28.1097	28.5018
17.1408	17.8407	16.7794	17.449
24.0631	23.7244	23.1644	23.2572
25.4801	25.1821	24.502	24.6309
28.0413	27.7124	27.0468	27.1253
29.0841	28.7223	27.9993	28.2158
6.92172	6.97178	6.66722	6.961
17.1547	17.5986	16.8812	17.2027
21.6573	22.0607	21.2304	21.6608
24.936	25.2615	24.3786	24.8144
26.2935	26.6213	25.763	26.0684
27.5715	27.8155	26.9014	27.1862
